# Supplementary material
Source: HighWire-hosted journal article supplement (https://jama.ama-assn.org/content/suppl/2009/11/18/302.16.1828)
Supplement: pdfpat102809.pdf [file pdfpat102809.pdf]

# Lesiones ocasionadas por quemaduras

Lo más común es que las quemaduras sean consecuencia del fuego, pero también pueden acaecer debido a productos químicos, electricidad y otros accidentes con el calor, como agua caliente o vapor. Más de 300 000 personas mueren cada año en todo el mundo debido a lesiones ocasionadas por quemaduras que se relacionan con el fuego. Muchas más personas resultan gravemente heridas, discapacitadas o desfiguradas debido a todos los tipos de quemaduras. Algunos factores de riesgo para las quemaduras son cocinar al fuego, las instalaciones abiertas para cocinar ubicadas en la planta baja de un edificio o residencia, llevar ropa suelta mientras se cocina, fumar, consumir alcohol, los calentadores de agua configurados a una temperatura demasiado alta, las deficiencias en la seguridad relativa a la electricidad y los niños sin supervisión. También pueden producirse lesiones ocupacionales que implican quemaduras, especialmente en lugares de trabajo con llamas abiertas, productos químicos o materiales sobrecalentados. El número de *JAMA* del 28 de octubre de 2009 incluye un artículo acerca del acceso a la atención para lesiones graves ocasionadas por quemaduras en los Estados Unidos.

## TIPOS DE QUEMADURAS

Las quemaduras se clasifican en función de la cantidad de capas de la piel que resultan involucradas. Las quemaduras de **primer grado** (o superficiales) involucran únicamente la capa superior de la piel y ocasionan las lesiones menos graves. Las quemaduras de **segundo grado** (o capas parciales) lesionan la piel a un nivel más profundo y causan ampollas. Las quemaduras de **tercer grado** (o capas completas) involucran todas las capas de la piel, incluidos los nervios que suministran a la piel, y son lesiones sumamente graves. Las quemaduras de **cuarto grado** se extienden hasta el músculo debajo de la piel.

Tipos (grados) de quemaduras

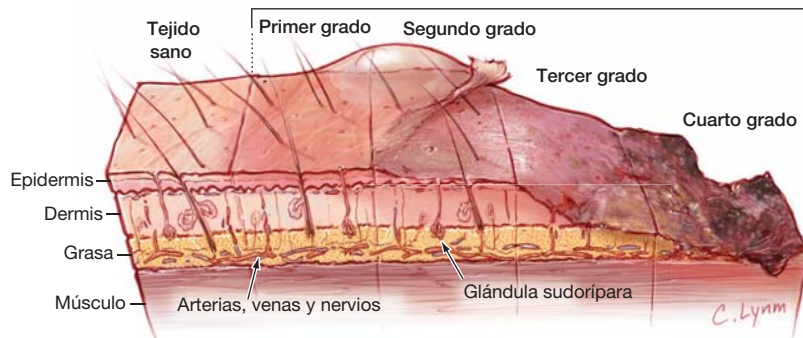

## TRATAMIENTO DE LAS QUEMADURAS

El tratamiento de las quemaduras depende de la gravedad de la quemadura, del tipo de quemadura y de la cantidad de tejido corporal involucrado. Las personas que han sufrido quemaduras en una gran superficie del cuerpo tienen un peor **pronóstico** (probabilidad de sobrevivir y estar bien después de una lesión). Algunas formas de tratar las quemaduras son administrar líquidos (de forma intravenosa en el caso de las quemaduras graves), tratar el dolor, realizar un **desbridamiento** quirúrgico (retirar el tejido muerto) en el caso de las quemaduras de tercer y cuarto grado, cuidados intensivos (a menudo en una unidad de cuidados intensivos especializada en el tratamiento de quemaduras) y realizar injertos de piel. En el caso de las personas con lesiones ocasionadas por quemaduras graves, a menudo se utiliza la fisioterapia, además de otros tratamientos, como forma de ayudar en la recuperación y prevenir complicaciones, como las **contracturas** (en las que se dificulta mucho el movimiento de la piel y el tejido corporal quemados).

## PREVENCIÓN

- No fume. Si fuma, nunca lo haga en la cama. Evite fumar mientras consume bebidas alcohólicas.
- Nunca arroje cigarrillos ni fósforos encendidos en ningún lugar. Deseche esos elementos peligrosos en ceniceros adecuados.
- Tenga sumo cuidado cuando se encuentre próximo a cualquier tipo de llama abierta.
- Supervise a los niños cuidadosamente.
- Siga las normas de seguridad en lo relativo a la electricidad. Nunca coloque aparatos eléctricos ni cables en o cerca del agua.
- No toque líneas de energía caídas.

## PRIMEROS AUXILIOS PARA QUEMADURAS

- Llame a los servicios de emergencia (911 en América del Norte) de inmediato en caso de quemaduras grandes, quemaduras de tercer o cuarto grado, quemaduras con otras lesiones o si la persona afectada pierde el conocimiento. Cualquier persona que sufra una quemadura eléctrica también debe recibir atención de emergencia de inmediato, puesto que también puede haber lesiones internas ocasionadas por la electricidad que no se ven.
- Procure atención médica rápidamente si la quemadura se produjo en el rostro, las manos, los pies, el área de los genitales o las nalgas, o si implica una articulación (como el codo o la rodilla).
- En el caso de quemaduras leves, haga correr agua fresca (no fría) sobre el área quemada. No frote las quemaduras ni les ponga hielo, mantequilla o aceite.
- Cubra la quemadura con un apósito de gasa limpio. Si se forma una ampolla, no intente romperla. Puede aplicarse suavemente un ungüento con antibiótico.

## PARA OBTENER MÁS INFORMACIÓN

- World Health Organization (Organización Mundial de la Salud) [www.who.int](http://www.who.int)
- American College of Emergency Physicians (Colegio Americano de Médicos de Emergencia) [www.acep.org](http://www.acep.org)
- American Burn Association (Asociación Americana de Quemaduras) [www.ameriburn.org](http://www.ameriburn.org)

## INFÓRMESE

Para encontrar esta y otras Hojas para el Paciente de *JAMA* anteriores, vaya al índice de Patient Page (Hoja para el Paciente) del sitio web de *JAMA* en [www.jama.com](http://www.jama.com). Muchas están disponibles en inglés y español.

Fuentes: American College of Emergency Physicians; American Academy of Family Physicians; Centers for Disease Control and Prevention; National Institutes of Health; American Burn Association

Janet M. Torpy, MD, Redactora

Cassio Lynn, MA, Ilustrador

Richard M. Glass, MD, Editor

La Hoja para el Paciente de *JAMA* es un servicio al público de *JAMA*. La información y las recomendaciones que aparecen en esta hoja son adecuadas en la mayoría de los casos, pero no reemplazan el diagnóstico médico. Para obtener información específica relacionada con su afección médica personal, *JAMA* le sugiere que consulte a su médico. Los médicos y otros profesionales de atención médica pueden fotocopiar esta hoja con fines no comerciales, para compartirla con pacientes. Para comprar reimpresiones en grandes cantidades, llame al 312/464-0776.

**JAMA**  
COPIA PARA  
SUS PACIENTES
